# Supplementary material for: Growth of Cu-BTC MOFs on dendrimer-like porous silica nanospheres for the catalytic aerobic epoxidation of olefins
Source: Royal Society of Chemistry journal article supplement (doi:10.1039/d0nj02672g), 2020-01-01
Supplement: d0nj02672g1.pdf [file d0nj02672g1.pdf]

## Supporting Information

### **Growth of Cu-BTC MOFs on dendrimer-like porous silica nanospheres for catalytic aerobic epoxidation of olefins**

Zihao Zhou <sup>a</sup>, Xiujuan Li <sup>a</sup>, Yulin Wang <sup>a</sup>, Yi Luan <sup>a,\*</sup>, Xiaoyu Li <sup>b,\*</sup>, Xin Du <sup>a,\*</sup>

<sup>a</sup> School of Materials Science and Engineering, University of Science and Technology, Beijing, 30 Xueyuan Road, Haidian District, Beijing 100083, P. R. China.

\* E-mail addresses: [yiluan@ustb.edu.cn](mailto:yiluan@ustb.edu.cn), [duxin@ustb.edu.cn](mailto:duxin@ustb.edu.cn)

<sup>b</sup> National Engineering Laboratory for Hydrometallurgical Cleaner Production Technology, Key Laboratory of Green Process and Engineering, Institute of Process Engineering, Chinese Academic of Sciences, Beijing 100190, China

\* E-mail addresses: [lixu@ipe.ac.cn](mailto:lixu@ipe.ac.cn)

**Table S1.** Experimental parameters of synthesis of the DPSNs@Cu<sub>2</sub>O and their properties.

| Sample                    | <i>L</i> -Ascorbic acid (mg) | 0.01 M Cu(NO <sub>3</sub> ) <sub>2</sub> solution (mL) | NH <sub>3</sub> ·H <sub>2</sub> O (μL) | Weight percentage of Cu <sub>2</sub> O calculated by weighing (wt.%) <sup>a</sup> | Particle size of Cu <sub>2</sub> O (nm) |
|---------------------------|------------------------------|--------------------------------------------------------|----------------------------------------|-----------------------------------------------------------------------------------|-----------------------------------------|
| DPSNs@Cu <sub>2</sub> O-1 | 17.5                         | 12.5                                                   | 15                                     | 5±2                                                                               | 10±5                                    |
| DPSNs@Cu <sub>2</sub> O-2 | 35                           | 25                                                     | 30                                     | 10±5                                                                              | 20±8                                    |
| DPSNs@Cu <sub>2</sub> O-3 | 70                           | 50                                                     | 60                                     | 20±5                                                                              | 30±9                                    |
| DPSNs@Cu <sub>2</sub> O-4 | 210                          | 150                                                    | 240                                    | 60±15                                                                             | 45±13                                   |

[a] The value is obtained by weighing the mass change of the sample before and after the preparation process.

**Table S2.** Experimental parameters of synthesis of the DPSNs@Cu-BTC and their properties.

| Sample         | Precursor                 | Weight percentage of the copper element via ICP-AES (wt.%) | Weight percentage of Cu-BTC calculated by ICP-AES (wt.%) <sup>a</sup> | Weight percentage of Cu-BTC calculated by weighing (wt.%) <sup>b</sup> | Particle size of Cu-BTC (nm) |
|----------------|---------------------------|------------------------------------------------------------|-----------------------------------------------------------------------|------------------------------------------------------------------------|------------------------------|
| DPSNs@Cu-BTC-1 | DPSNs@Cu <sub>2</sub> O-1 | 1.38                                                       | 6.57                                                                  | 5±2                                                                    | 20±5~50±10                   |
| DPSNs@Cu-BTC-2 | DPSNs@Cu <sub>2</sub> O-2 | 4.00                                                       | 17.33                                                                 | 17±5                                                                   | 20±5~50±10                   |
| DPSNs@Cu-BTC-3 | DPSNs@Cu <sub>2</sub> O-3 | 9.24                                                       | 33.87                                                                 | 40±5                                                                   | 20±5~50±10                   |
| DPSNs@Cu-BTC-4 | DPSNs@Cu <sub>2</sub> O-4 | 30.95                                                      | 69.28                                                                 | 72±15                                                                  | 40±10~90±18                  |

[a] Calculate the molar amount of copper through ICP-AES datas, and thus calculate the actual value of weight and percentage of Cu-BTC. Cu-BTC= C<sub>18</sub>H<sub>12</sub>O<sub>15</sub>Cu<sub>3</sub> [1]

[b] The value is obtained by weighing the mass change of the sample before and after the preparation process.

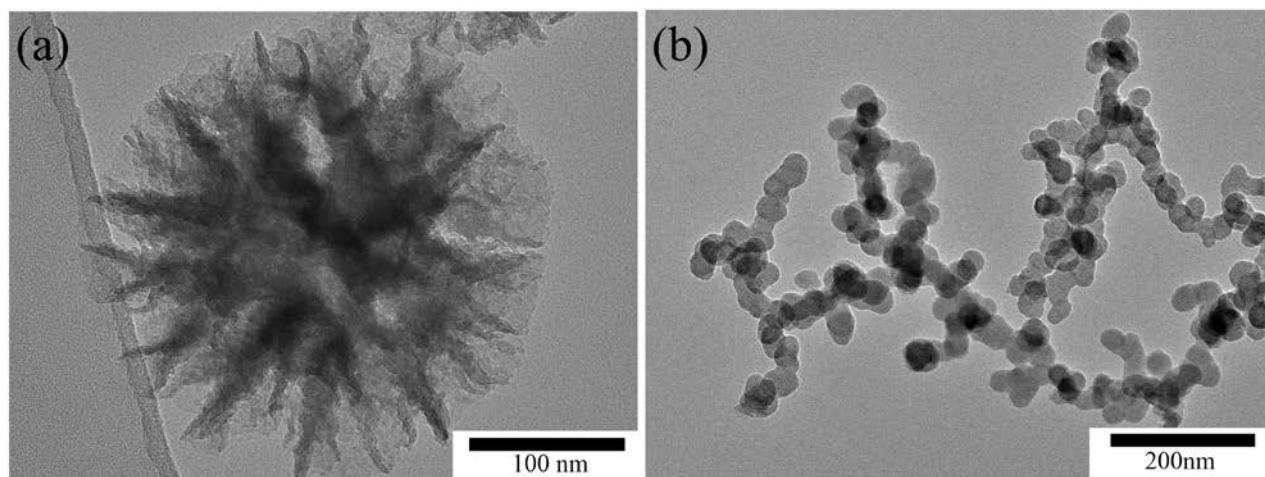

Fig. S1. TEM images of DPSN (a) and Cu<sub>2</sub>O (b).

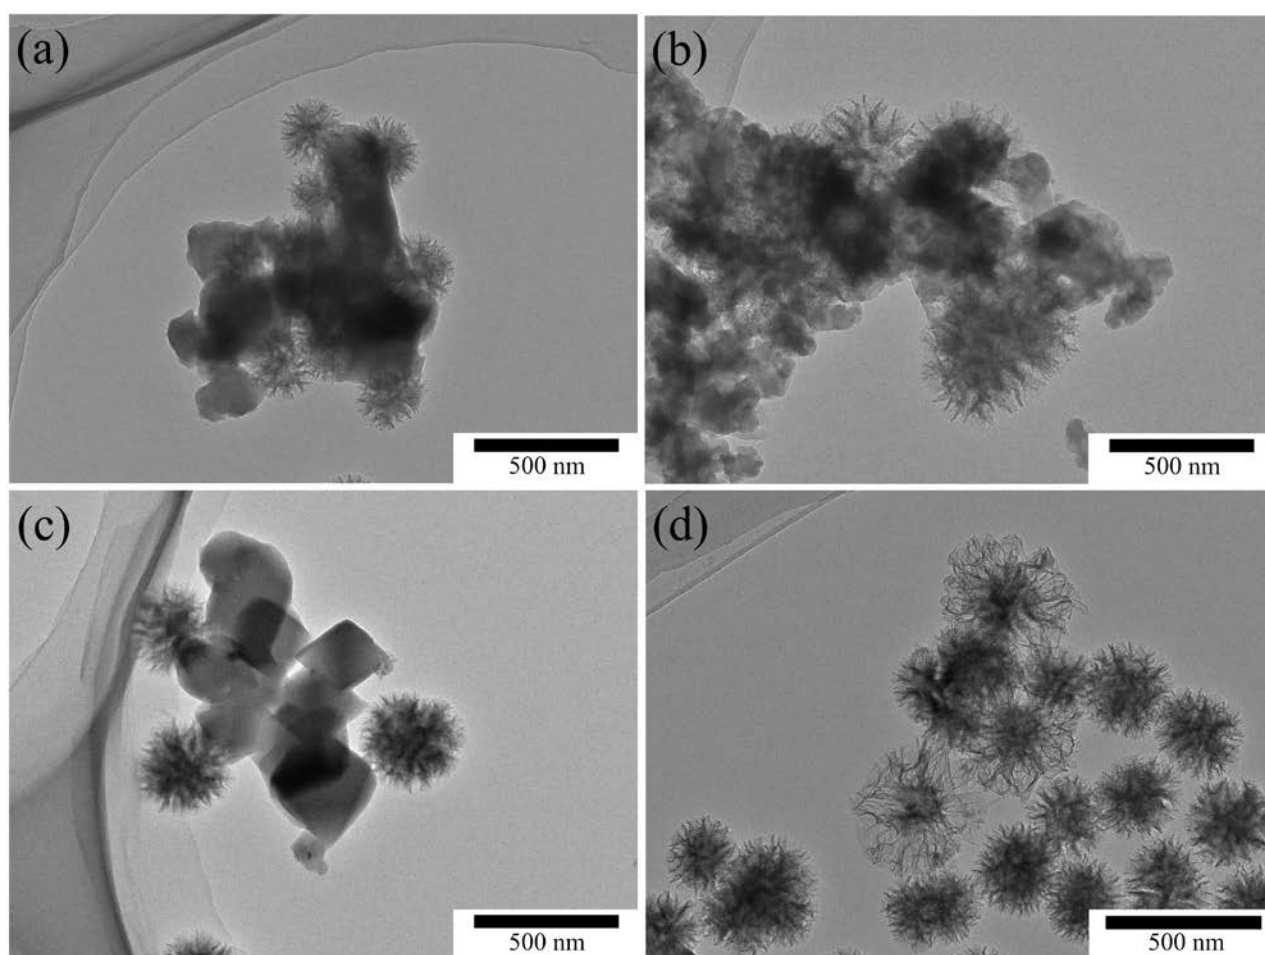

Fig. S2. TEM images of DPSN@Cu-BTC through different synthesis methods: (a) Hydrothermal synthesis, (b) Ultrasonic synthesis, (c) Ethanol reflux method, (d) Layer by layer coating.

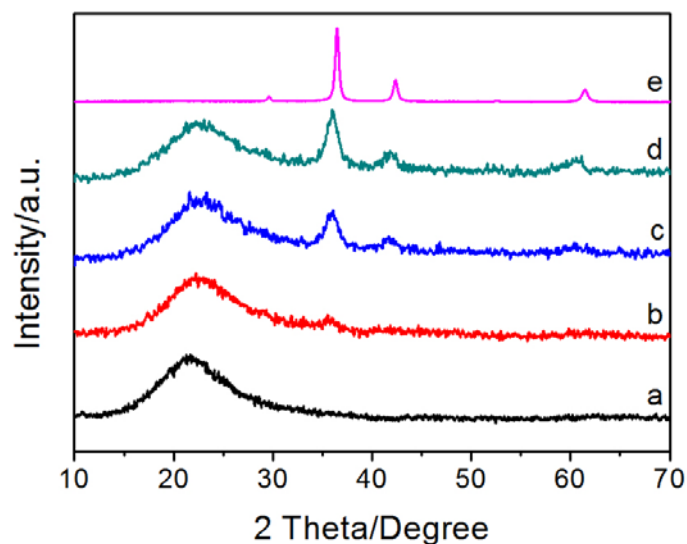

Fig. S3. X-ray diffraction patterns of DPSNs@Cu<sub>2</sub>O: (a) DPSNs, (b) DPSNs@Cu<sub>2</sub>O-1, (c) DPSNs@Cu<sub>2</sub>O-2, (d) DPSNs@Cu<sub>2</sub>O -3 and (e) Cu<sub>2</sub>O.

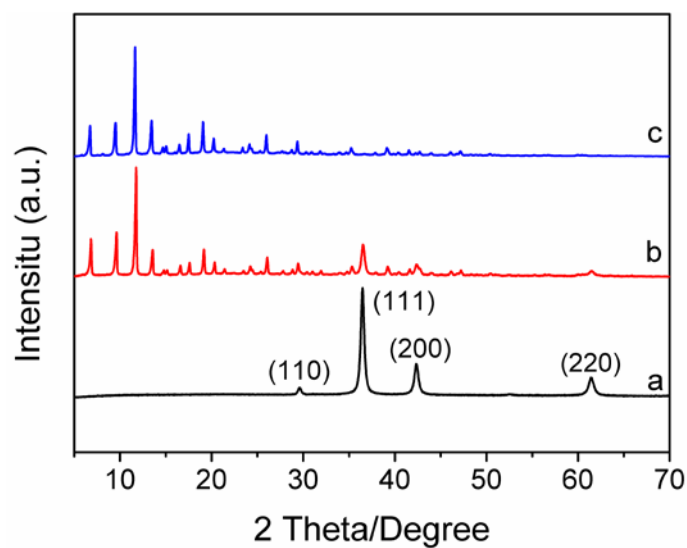

Fig. S4. X-ray diffraction patterns of Cu-BTC: (a) Cu<sub>2</sub>O, (b) Cu-BTC prepared from Cu<sub>2</sub>O NPs, (c) Cu-BTC prepared by hydrothermal method.

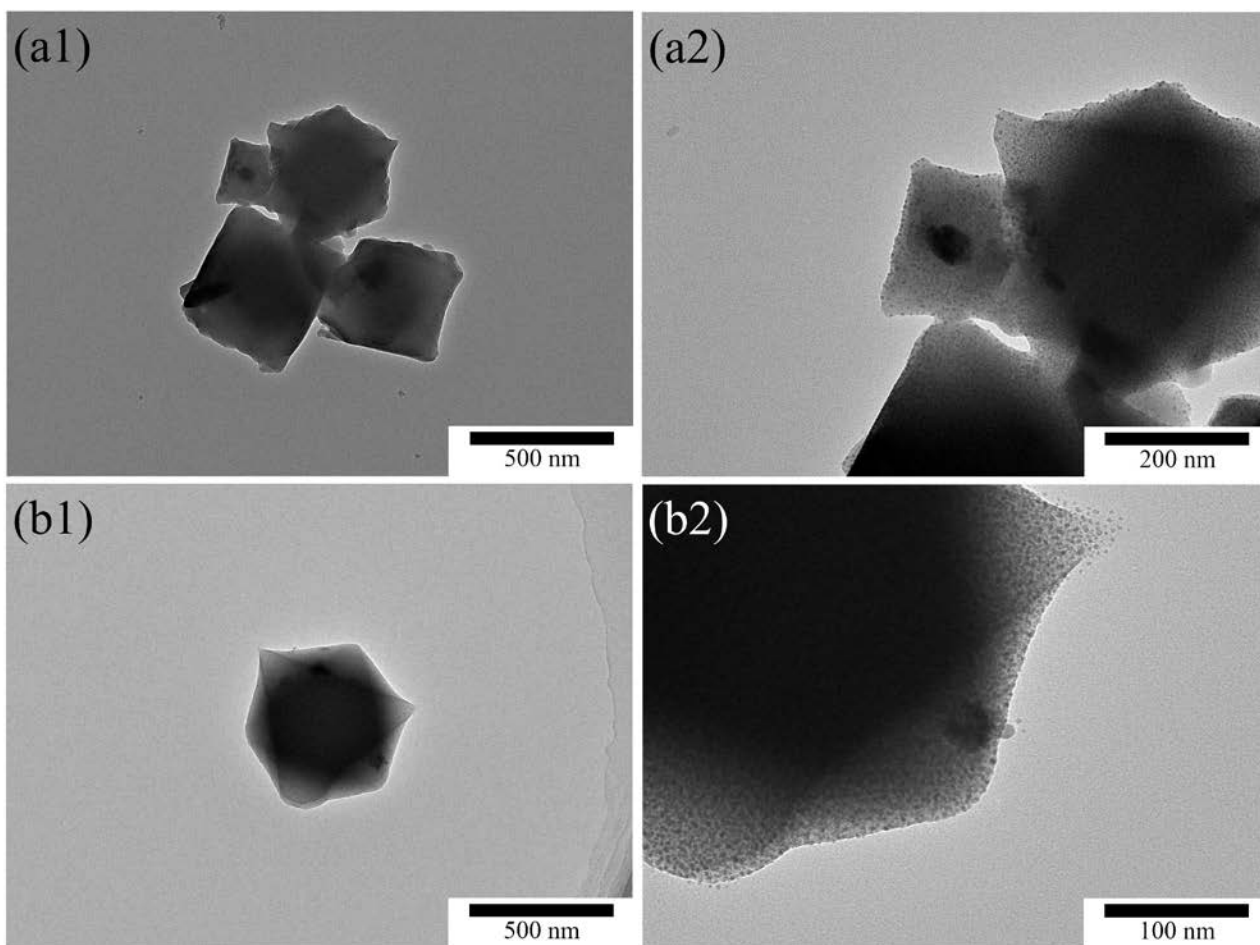

Fig. S5. TEM images of Cu-BTC prepared from  $\text{Cu}_2\text{O}$  NPs.

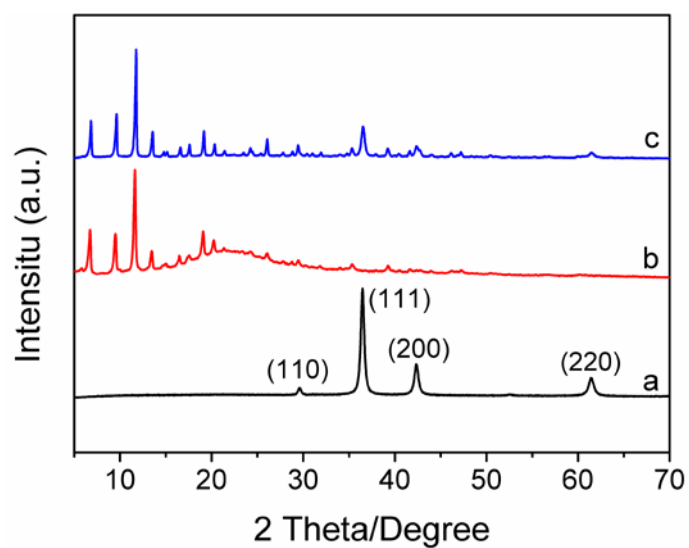

Fig. S6. X-ray diffraction patterns of DPSNs@Cu-BTC: (a)  $\text{Cu}_2\text{O}$ , (b) DPSNs@Cu-BTC prepared from DPSNs@ $\text{Cu}_2\text{O}$ -70 wt%, (c) Cu-BTC prepared from  $\text{Cu}_2\text{O}$  NPs.

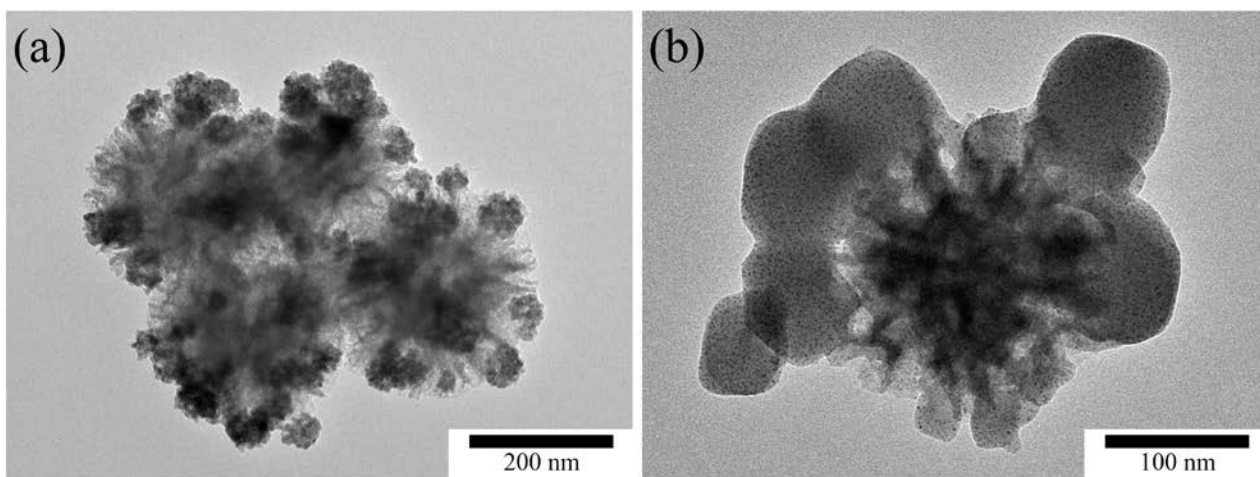

Fig. S7. TEM images of DPSNs@Cu<sub>2</sub>O-4 (a) and DPSNs@Cu-BTC-4 (b).

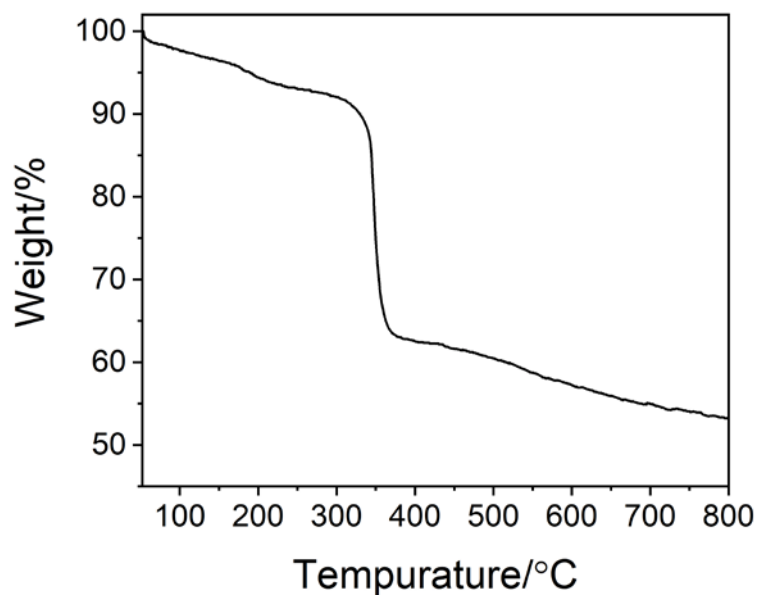

Fig. S8. TGA diagrams of Cu-BTC prepared from Cu<sub>2</sub>O NPs.

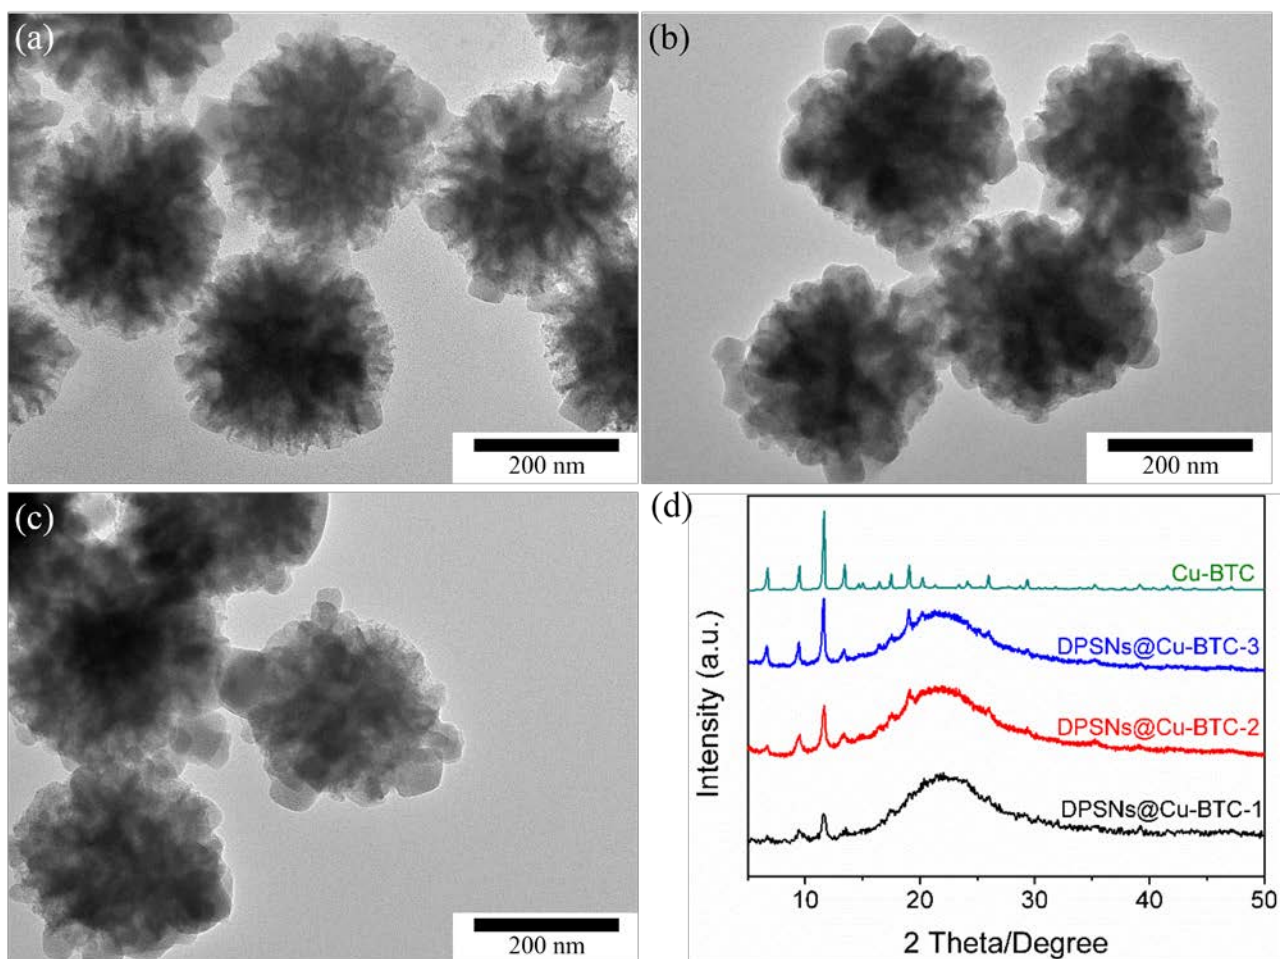

Fig. S9. TEM images of DPSNs@Cu-BTC after ten cycles: (a) DPSNs@Cu-BTC-1, (b) DPSNs@Cu-BTC-2, (c) DPSNs@Cu-BTC-3; (d) X-ray diffraction patterns of DPSNs@Cu-BTC after ten cycles.

## References

- [1] S. S.Y. Chui, S. M. F. Lo, J. P. H. Charmant, A. G. Orpen, I. D. Williams, A Chemically Functionalizable Nanoporous Material  $[\text{Cu}_3(\text{TMA})_2(\text{H}_2\text{O})_3]_n$ , *Science* 283 (1999) 1148–1150.
